# Supplementary material for: Introduction of Co3O4 into activated honeycomb-like carbon for the fabrication of high performance electrode materials for supercapacitors
Source: Royal Society of Chemistry journal article supplement (doi:10.1039/c6cp00384b), 2016-01-01
Supplement: c6cp00384b1.pdf [file c6cp00384b1.pdf]

Supporting online Materials for

**Introduction of  $\text{Co}_3\text{O}_4$  to activated honeycomb-like carbon for high  
performance electrode materials for supercapacitors**

Myeongjin Kim, Ilgeun Oh, Hyun Ju and Jooheon Kim\*

School of Chemical Engineering & Materials Science, Chung-Ang University, Seoul 156-756, Korea

\*Corresponding author: Jooheon Kim, [Tel:+82-2-820-5763](tel:+82-2-820-5763); Fax:+82-2-812-3495; E-mail address:

[jooheonkim@cau.ac.kr](mailto:jooheonkim@cau.ac.kr) (J. Kim)

1. High-magnification FE-SEM image for  $\text{Co}_3\text{O}_4$ , HCCA(3)/ $\text{Co}_3\text{O}_4$ .

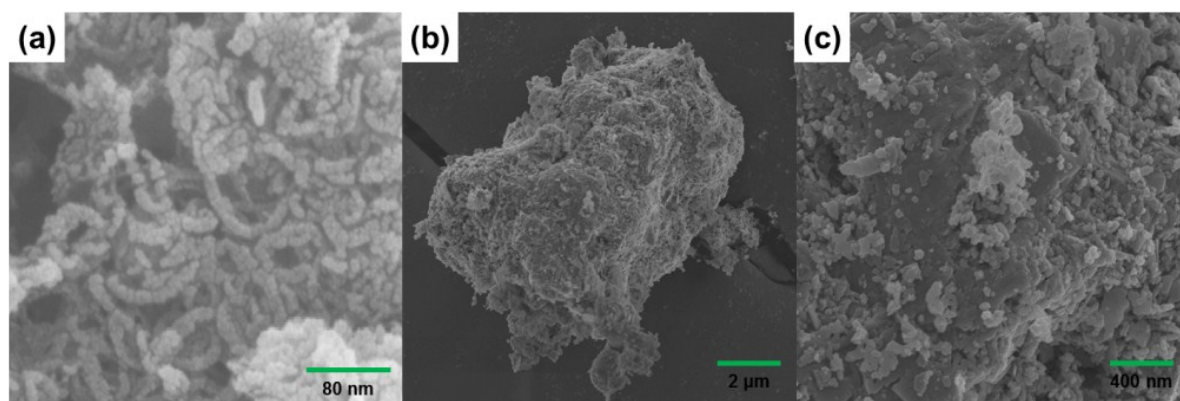

**Figure S1.** High magnification FE-SEM image of (a) HCCA(3)/ $\text{Co}_3\text{O}_4$  and (c) pristine  $\text{Co}_3\text{O}_4$ ; (b) low magnification FE-SEM image of pristine  $\text{Co}_3\text{O}_4$

2. XRD pattern of pristine  $\text{Co(OH)}_2$ .

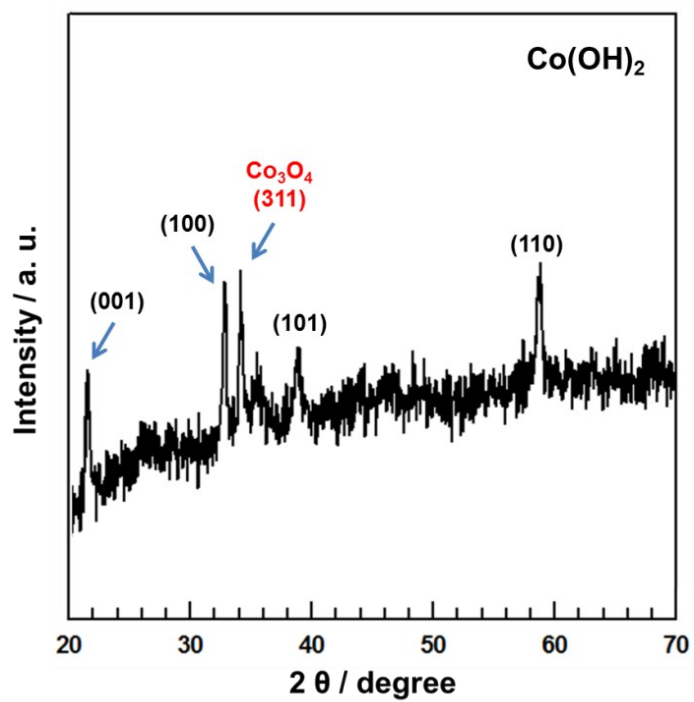

**Figure S2.** XRD pattern of pristine  $\text{Co(OH)}_2$ , before calcination of pristine  $\text{Co}_3\text{O}_4$
